# Supplementary material for: Sasa borealis leaf extract-mediated green synthesis of silver–silver chloride nanoparticles and their antibacterial and anticancer activities
Source: Royal Society of Chemistry journal article supplement (doi:10.1039/c6nj03454c), 2017-01-01
Supplement: c6nj03454c1.pdf [file c6nj03454c1.pdf]

## ***Sasa borealis* leaf extract-mediated green synthesis of silver-silver chloride nanoparticles and their antibacterial and anticancer activities**

Maheshkumar Prakash Patil <sup>a</sup>, Jaymee Palma <sup>b</sup>, Natasha Chantal Simeon <sup>b</sup>, Xing Jin <sup>b</sup>, Xiaolin Liu <sup>b</sup>, Daniel Ngabire <sup>a</sup>,  
Nan-Hee Kim <sup>a</sup>, Naresh Hiralal Tarte <sup>b</sup>, Gun-Do Kim <sup>\*a</sup>

<sup>a</sup> Department of Microbiology, College of Natural Sciences, Pukyong National University, 45 Yongso-ro, Nam-gu, Busan 48513, Republic of Korea.

E-mail: gundokim@pknu.ac.kr

<sup>b</sup> Korea Science Academy of KAIST, 105-47, Baegyangwanmun-ro, Busanjin-gu, Busan 47162, Republic of Korea.

### Supporting information

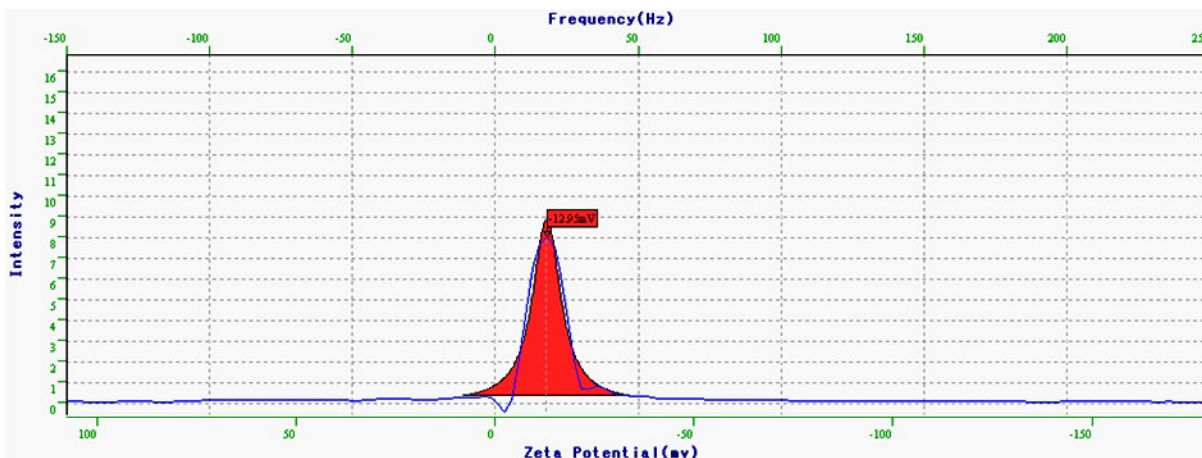

**Fig. S1** Zeta potential report of Ag-AgCl NPs synthesized using *S. borealis* leaves extract.
